# Supplementary material for: Potential of APOBEC3B as a therapeutic target and its role in bladder cancer onset and progression
Source: Research Square preprint supplement (doi:10.21203/rs.3.rs-6204060/v1), 2025-04-04
Supplement: Supplementary file 1 [file 5cc8cc34f0eb218374265e91.docx]

**Table S2: The relationship between the high and low expression group of APOBEC3B in clinical tissue samples and clinical features**

| **Characteristic** | A3B expression | | *Z* value | *P* value |
| --- | --- | --- | --- | --- |
| Low | High |
| Gender |  |  | 0.3798 | 0.7041 |
| Male | 26 | 26 |  |  |
| Female | 4 | 4 |  |  |
| Age |  |  | 0.1492 | 0.8814 |
| ≤60 | 8 | 7 |  |  |
| >60 | 21 | 24 |  |  |
| Smoking |  |  | 0.5551 | 0.5789 |
| Yes | 22 | 19 |  |  |
| No | 8 | 11 |  |  |
| Drinking |  |  | 0.2669 | 0.7895 |
| Yes | 7 | 7 |  |  |
| No | 19 | 27 |  |  |
| Histologic grade |  |  | 0.1852 | 0.8531 |
| High grade | 17 | 23 |  |  |
| Low grade | 8 | 12 |  |  |
| T stage |  |  | 1.309 | 0.1904 |
| T1-2 | 18 | 30 |  |  |
| T3-4 | 7 | 5 |  |  |
| N stage |  |  | 0.07895 | 0.9371 |
| N1&N2&N3 | 2 | 3 |  |  |
| N0 | 23 | 32 |  |  |
