# Supplementary material for: Potential of APOBEC3B as a therapeutic target and its role in bladder cancer onset and progression
Source: Research Square preprint supplement (doi:10.21203/rs.3.rs-6204060/v1), 2025-04-04
Supplement: Supplementary file 2 [file 67a1138e16dc4b7363cc9994.docx]

**Highlights**

1. A3B expression is significantly elevated in BCa and correlates with increased somatic mutations.
2. High A3B expression is associated with enrichment in cell cycle, cytokine-cytokine receptor interaction, and inflammatory response pathways.
3. A3B expression level is linked to immune cell infiltration and immune checkpoint-related gene expression in BCa.
4. Increased A3B expression is related to higher tumor mutation burden and positive response to immunotherapy in metastatic urothelial carcinoma patients.
5. A3B promotes the initiation and progression of BCa and enhances the polarization of M2-like tumor-associated macrophages.
6. A3B may represent a promising therapeutic target for BCa treatment.
