# Supplementary material for: Potential of APOBEC3B as a therapeutic target and its role in bladder cancer onset and progression
Source: Research Square preprint supplement (doi:10.21203/rs.3.rs-6204060/v1), 2025-04-04
Supplement: Supplementary file 3 [file d5f532c48fce338676249748.docx]

**Table S1: Primers used in this study**

| **Gene** | **Forward sequence (5' – 3')** | **Reverse sequence (5' – 3')** |
| --- | --- | --- |
| qRT-PCR primers | | |
| APOBEC3B | CAACTTTGAAAACGAACCC | ACACTTGTAAGCAGGCAGC |
| GAPDH | CCCATCACCATCTTCCAGG | CATCACGCCACAGTTTCCC |
